# Supplementary material
Source: PubMed Central journal article supplement (PMC3286207)
Supplement: supp_blood-2011-04-350686_Document1.pdf [file supp_blood-2011-04-350686_Document1.pdf]

**Isolation of mouse thymocytes and splenic T cells.** Thymus and spleen were harvested from 8-10 week old female C57BL/6 mice. Single cell suspensions were prepared by passing the organs through 70  $\mu\text{m}$  sieve. Red blood cells were lysed in the ACK buffer. T cells were isolated from spleen by removing adherent non-T cells in a nylon wool column (reference no. 1 in the Supplement). Thymocytes and splenic T cells were lysed in a modified RIPA buffer (reference no. 12 in the main manuscript).

## REFERENCES

1. Eisen SA, Wedner HJ, Parker CW. Isolation of pure human peripheral blood T-lymphocytes using nylon wool columns. *Immunol Commun.* 1972;1(6):571-577.

| <b>Primer Set</b> | <b>Amplified Region of cDNA</b> | <b>Primer Direction</b> | <b>Sequence</b>             |
|-------------------|---------------------------------|-------------------------|-----------------------------|
| Set 1             | 18-944                          | forward                 | ATTACAGCCGGCGCAGGCAGCG      |
|                   |                                 | reverse                 | CCAGGTACCCTTCCTCCCAACA      |
| Set 2             | 453-1387                        | forward                 | TTTGTCCGCTACCAGTTCAC        |
|                   |                                 | reverse                 | CGGCCTTTGAACAGAAAAGGAAAAAGT |

**Table S1. Primers used to amplify Unc119 cDNA.** Base positions are numbered from 5' to 3' end according to a published human Unc119 mRNA sequence (GeneBank accession # NM\_005148.3).

| <b>Primer Set</b> | <b>Amplified Exons</b>      | <b>Primer Direction</b> | <b>Sequence</b>        |
|-------------------|-----------------------------|-------------------------|------------------------|
| Set 1             | promoter of the Unc119 gene | forward                 | GTGTCTGGCGTGTAGTAGGC   |
|                   |                             | reverse                 | ATTCCGCAGGCGGCTGTGGTAT |
| Set 2             | exon 1 of the Unc119 gene   | forward                 | ATTCCTGAGCCTGGA ACTCAC |
|                   |                             | reverse                 | TATCTGCTGCCGCACGTACCT  |
| Set 3             | exon 2 of the Unc119 gene   | forward                 | GCGGAGTTATGTCTCTTCCA   |
|                   |                             | reverse                 | GCCTGCAGACTCCTGAGAAT   |
| Set 4             | exon 3 of the Unc119 gene   | forward                 | AAGCACAGTGGCGATTGG     |
|                   |                             | reverse                 | GCGGAAGTTGTTGACAGG     |
| Set 5             | exon 4 of the Unc119 gene   | forward                 | CTGAGCCTGGCTGGCTAGTT   |
|                   |                             | reverse                 | TGGTGGCAGACACAGAAGAG   |
| Set 6             | exon 5 of the Unc119 gene   | forward                 | TCTGTGTCTGCCACCATTCC   |
|                   |                             | reverse                 | CCTCTCCAGCTCCATCATGT   |

**Table S2. Primers used to amplify regions of the Unc119 gene**

| <b>Primer Set</b> | <b>Amplified Exons</b>             | <b>Primer Direction</b> | <b>Sequence</b>         |
|-------------------|------------------------------------|-------------------------|-------------------------|
| Set 1             | exon 2 and 3 of the Lck gene       | forward                 | GCGTGCACACCTCTCCAGTA    |
|                   |                                    | reverse                 | AGCCTCTCCAGCCTGGTTAG    |
| Set 2             | exon 4 and 5 of the Lck gene       | forward                 | GAGAGGCTGAGAGCAGAG      |
|                   |                                    | reverse                 | TCAGCCGTCGACCTGAGA      |
| Set 3             | exon 6 and 7 of the Lck gene       | forward                 | ATACTGAGCGAGCCACACTGA   |
|                   |                                    | reverse                 | TTACCTGGTTCTGGTCGAAGTC  |
| Set 4             | exon 8 of the Lck gene             | forward                 | GCCAGACTCACTGCGTTCTT    |
|                   |                                    | reverse                 | GGCAGGCCTCGTATTGACAC    |
| Set 5             | exon 9 and 10 of the Lck gene      | forward                 | CTTGAGGTGGTGTCAATACGA   |
|                   |                                    | reverse                 | TTATGCCACCACACCTGGCTACT |
| Set 6             | exon 11, 12 and 13 of the Lck gene | forward                 | CTCCTCCATTCTCACTCTTC    |
|                   |                                    | reverse                 | AGAGGAGATGCAGCTACA      |
| Set 7             | exon 14 of the Lck gene            | forward                 | TGCTCACACTGTGCCAGTTA    |
|                   |                                    | reverse                 | GCCTCCAGACATCCACTCAT    |

**Table S3. Primers used to amplify regions of the Lck gene**

| <b>Primer/Probe Name</b>               | <b>Sequence</b>   | <b>Fluorescent Dye</b> |
|----------------------------------------|-------------------|------------------------|
| Unc119 forward primer                  | ACGGCGACGGAGTCC   | none                   |
| Unc119 reverse primer                  | AGGCGGCTGTGGTATGG | none                   |
| wild type Unc119 allele-specific probe | CCTCGGGCCAGAGC    | VIC                    |
| mutant Unc119 allele-specific probe    | CCCTCGGTCCAGAGC   | FAM                    |

**Table S4. Primers and probes used in the 5'-nuclease allelic discrimination assay**

|                            | Secondary CD4 lymphopenic patients |     |      |      |      |      |     |     | Healthy subjects |
|----------------------------|------------------------------------|-----|------|------|------|------|-----|-----|------------------|
|                            | P4                                 | P5  | P6   | P7   | P8   | P9   | P10 | P11 |                  |
| Total lymphocytes/ $\mu$ l | 969                                | 672 | 1397 | 1044 | 1377 | 1432 | 710 | 980 | 1000-4800        |
| CD3+ lymphocytes/ $\mu$ l  | 640                                | 373 | 780  | 493  | 947  | 785  | 381 | 504 | 678-2504         |
| CD4+ lymphocytes/ $\mu$ l  | 298                                | 202 | 328  | 299  | 306  | 295  | 222 | 295 | 414-1679         |
| CD8+ lymphocytes/ $\mu$ l  | 206                                | 170 | 462  | 149  | 477  | 463  | 160 | 205 | 162-1038         |
| CD4/CD8 ratio              | 2.02                               | 1.8 | 0.7  | 2.01 | 0.64 | 0.63 | 1.3 | 1.4 | 1-3.60           |
| CD19+ lymphocytes/ $\mu$ l | 114                                | 149 | 87   | 375  | 233  | 401  | 169 | 268 | 96-515           |
| CD16/56+ NK cells/ $\mu$ l | 224                                | 139 | 524  | 166  | 149  | 325  | 149 | 210 | 45-523           |

**Table S5. Lymphocyte subsets in the blood of patients with secondary CD4 lymphopenia**

### Autoradiography of a kinase reaction

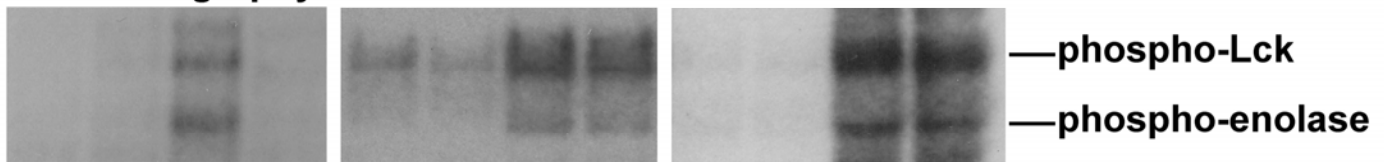

### WB: Lck

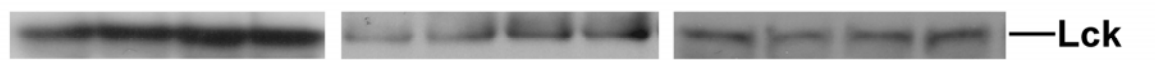

| subject | anti-CD3 | Lanes |
|---------|----------|-------|
| C       | -        | 1     |
| P4      | -        | 2     |
| C       | +        | 3     |
| P4      | +        | 4     |
| C       | -        | 5     |
| P5      | -        | 6     |
| C       | +        | 7     |
| P5      | +        | 8     |
| C       | -        | 9     |
| P6      | -        | 10    |
| C       | +        | 11    |
| P6      | +        | 12    |

**Figure S1**

**Figure S1. Lck activity in CD4 T cells from patients with secondary CD4 lymphopenia.** Peripheral blood CD4 T cells from healthy control subjects (C), patients with CD4 lymphopenia in the course of mycobacterial infection (P4), SLE (P5), and CVID (P6) were incubated with (+) or without (-) a plate-bound anti-CD3 antibody for 5 min and lysed. The enzymatic activity of Lck in lysates was examined as in Figure 1. Each radiography image and a corresponding blot is representative of 3 experiments.

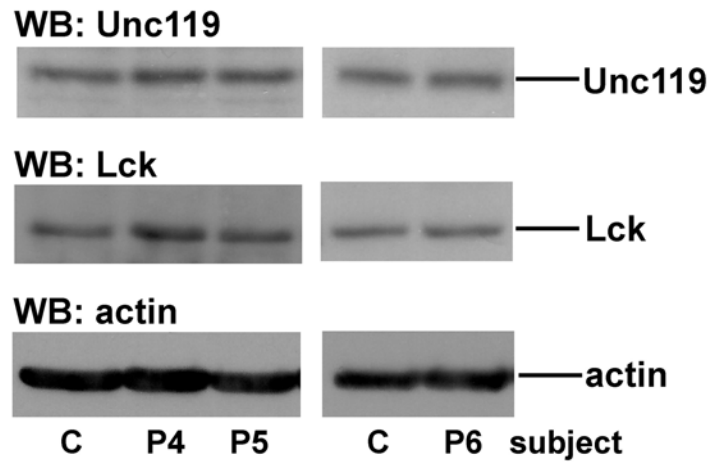

**Figure S2**

**Figure S2. Expression of Unc119 and Lck proteins in patients with secondary CD4 lymphopenia.** CD4 T cells from subjects as in Figure S1 were lysed and blotted with anti-Unc119, anti-Lck and anti-actin antibodies. Each blot represents one of 3 independent experiments.



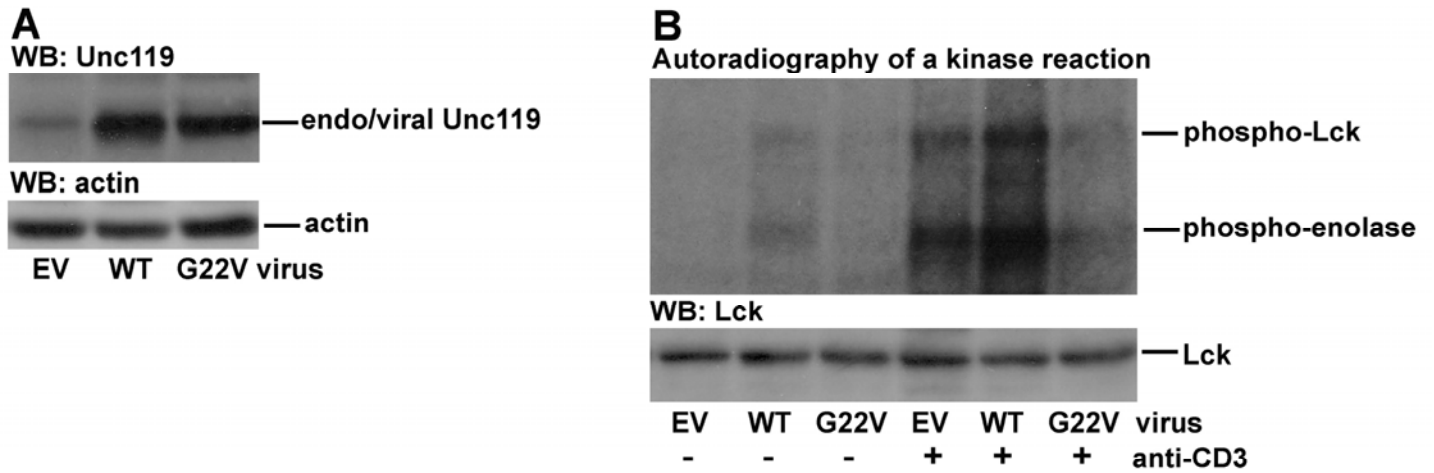

**Figure S3**

**Figure S3. Effect of Unc119 G22V on activation of Lck.** (A) Jurkat cells were infected separately with an empty retrovirus (EV), and retroviruses for untagged wild type Unc119 (WT) or untagged mutant Unc119 (G22V). The GFP-negative retroviral vector pMSCVneo was used for cloning<sup>13</sup>. Jurkat clones were isolated by limiting dilution. The lysates from the clones were blotted as in Figure 3A. endo, endogenous (B) Jurkat clones were analyzed for Lck activity as in Figure 1. Figures S3A and S3B are representative of three different experiments.

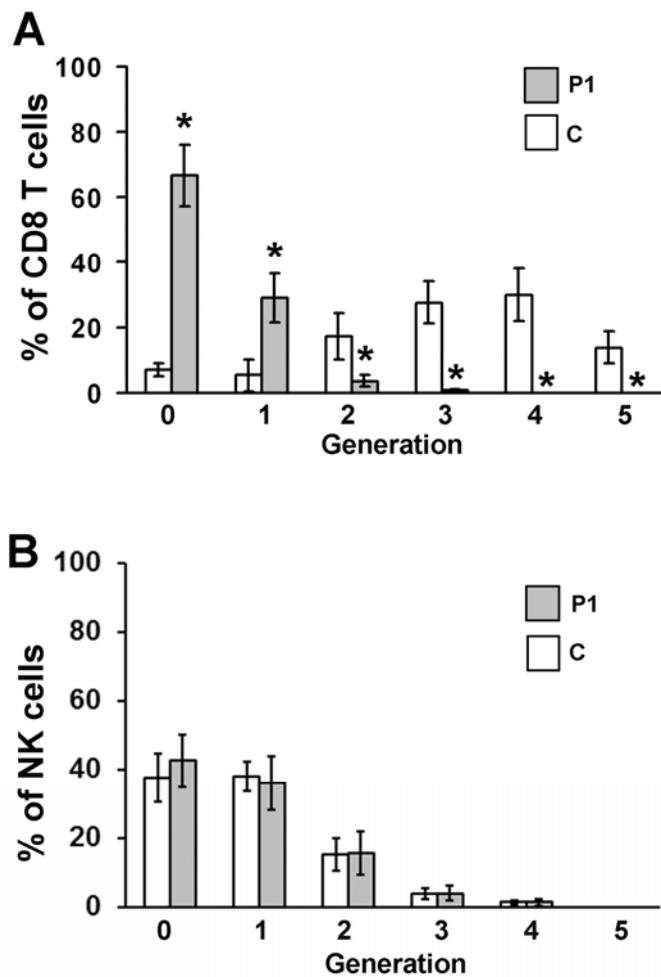

**Figure S4**

**Figure S4. Proliferation of CD8 T cells and NK cells of the patient P1.** (A) Peripheral blood mononuclear cells from the patient P1 and healthy controls (C) were labeled with CFSE and stimulated with plastic-bound anti-CD3 and anti-CD28 antibodies for 72h. Cells were then stained with a PE-labeled anti-CD8 antibody. The progressive dilution of the CFSE dye in daughter CD8 T cell generations (“0” denotes undivided cells, “1” denotes cells after first division etc) was analyzed by flow cytometry. The graph shows percentage (mean  $\pm$  SD) of CD8 T cells in each generation. N=4 experiments; \*, P<0.05 (Mann-Whitney test, pairwise comparison). (B) CFSE-labeled peripheral blood mononuclear cells from the patient P1 and healthy control subjects were stimulated with IL-15 for 5 days and, then, stained with PE-labeled anti-CD3 and APC-labeled anti-CD56 antibodies. The dilution of the CFSE dye in the CD3<sup>negative</sup>CD56<sup>positive</sup> cell (NK cell) population was studied by flow cytometry as in S4A. N=3 experiments.

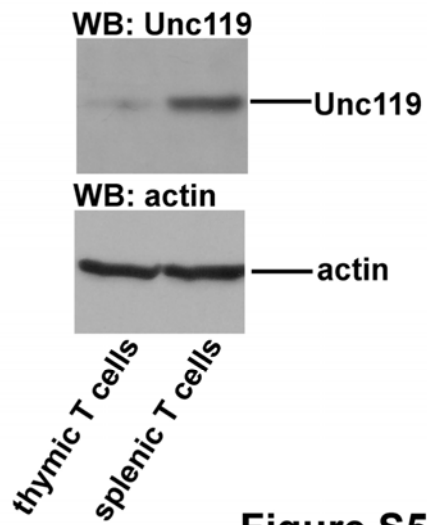

**Figure S5**

**Figure S5. Expression of Unc119 in thymocytes and splenic T cells.** Thymocytes and splenic T cells from C57BL/6 mice were lysed and blotted with anti-Unc119 and anti-actin antibodies (N=3).
